# Supplementary material for: Effectiveness of eHealth interventions for reducing mental health conditions in employees: A systematic review and meta-analysis
Source: PubMed Central journal article supplement (PMC5739441; doi:10.1371/journal.pone.0189904), 2017-12-21
Supplement: pone.0189904.s001.pdf [file pone.0189904.s001.pdf]

| <b>Table 1: Example search strategy terms<br/>MEDLINE (via OvidSP) - Medical Subject Headings [MeSH]</b> |                                                                                                                   |                                                                          |                                                                                        |
|----------------------------------------------------------------------------------------------------------|-------------------------------------------------------------------------------------------------------------------|--------------------------------------------------------------------------|----------------------------------------------------------------------------------------|
| <b>Workplace</b>                                                                                         | <b>Intervention</b>                                                                                               | <b>Outcomes</b>                                                          | <b>Study design</b>                                                                    |
| 1.employment.ti.                                                                                         | 13.Exp Self Care/ or<br>exp Telemedicine/ or<br>exp Internet/ or exp<br>Medical Records<br>Systems, Computerized/ | 28.stress.tw.                                                            | 40.RCT.tw.                                                                             |
| 2.job.ti.                                                                                                | 14.telemedicine*.tw.                                                                                              | 29.mental health.ti.                                                     | 41.randomised control<br>trial.tw.                                                     |
| 3.work*.ti.                                                                                              | 15.online.tw.                                                                                                     | 30.mental illness.ti                                                     | 42.random allocation.tw.                                                               |
| 4.worker*.ti.                                                                                            | 16.internet.tw.                                                                                                   | 31.mental disorder*.ti.                                                  | 43.Randomized<br>Controlled Trials as<br>Topic/                                        |
| 5.exp employment/                                                                                        | 17.internet<br>intervention*.tw.                                                                                  | 32.depress*.tw.                                                          | 44.clinical trial.tw                                                                   |
| 6.work place*.tw.                                                                                        | 18.web-based.tw.                                                                                                  | 33.anxiety*.tw.                                                          | 45.controlled clinical<br>trial.tw                                                     |
| 7.workplace.tw.                                                                                          | 19.therapy*.tw                                                                                                    | 34.affective symptoms.sh.                                                | 46.pre post trial.tw.                                                                  |
| 8.occupation*.tw.                                                                                        | 20.prevent*.tw.                                                                                                   | 35.depression.sh                                                         | 47. 40 or 41 or 42 or 43<br>or 44 or 45 or 46                                          |
| 9.work*.tw.                                                                                              | 21.stress<br>management.tw.                                                                                       | 36.anxiety.sh.                                                           | 48. 12 and 27 and 39 and<br>47                                                         |
| 10.employee.tw.                                                                                          | 22.cognitive behaviour*<br>therapy.tw                                                                             | 37.mental disorder*.sh.                                                  | 49. limit 48 to (English<br>language and humans and<br>"all adult (19 plus<br>years)") |
| 11.manager*.tw.                                                                                          | 23.cognitive behavior*<br>therapy.tw                                                                              | 38.mental health.sh                                                      |                                                                                        |
| 12.1 or 2 or 3 or 4 or 5 or 6<br>or 7 or 8 or 9 or 10 or 11                                              | 24.smartphone.tw.                                                                                                 | 39. 28 or 29 or 30 or 31 or<br>32 or 33 or 34 or 35 or 36 or<br>37 or 38 |                                                                                        |
|                                                                                                          | 25.Therapy, Computer-<br>Assisted/ or Computers/<br>or Internet/                                                  |                                                                          |                                                                                        |
|                                                                                                          | 26.intervention*.tw.                                                                                              |                                                                          |                                                                                        |
|                                                                                                          | 27.13 or 14 or 15 or 16<br>or 17 or 18 or 19 or 20<br>or 21 or 22 or 23 or 24<br>or 25 or 26                      |                                                                          |                                                                                        |
